# Supplementary material for: Hermit crab response to a visual threat is sensitive to looming cues
Source: PeerJ. 2017 Nov 30;5:e4058. doi: 10.7717/peerj.4058 (PMC5712464; doi:10.7717/peerj.4058)
Supplement: Supplemental Information 1 [file peerj-05-4058-s001.xlsx]

## Sheet: Experiment 1 raw data
Crab #	Condition	Hide
54	Static	didn't hide
62	Static	didn't hide
64	Static	didn't hide
65	Static	didn't hide
70	Static	didn't hide
72	Static	didn't hide
74	Static	hid
80	Static	didn't hide
82	Static	didn't hide
84	Static	hid
59	Contracting	didn't hide
61	Contracting	didn't hide
63	Contracting	didn't hide
67	Contracting	hid
69	Contracting	didn't hide
71	Contracting	didn't hide
77	Contracting	didn't hide
79	Contracting	didn't hide
81	Contracting	didn't hide
86	Contracting	didn't hide
55	Expanding	hid
60	Expanding	hid
66	Expanding	didn't hide
68	Expanding	hid
73	Expanding	didn't hide
75	Expanding	hid
78	Expanding	hid
83	Expanding	hid
85	Expanding	hid
87	Expanding	didn't hide
	Condition	# hid	% hid
	Static	2	20
	Contracting	1	10
	Expanding	7	70
